# Supplementary material for: Late Cretaceous (late Campanian–Maastrichtian) sea-surface temperature record of the Boreal Chalk Sea
Source: Copernicus journal article supplement (doi:10.5194/cp-12-429-2016), 2016-02-24
Supplement: Supplementary file 1 [file cp-12-429-2016-supplement.zip]

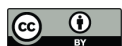

## *Supplement of*

# **Late Cretaceous (late Campanian–Maastrichtian) sea-surface temperature record of the Boreal Chalk Sea**

**Nicolas Thibault et al.**

*Correspondence to:* Nicolas Thibault (nt@ign.ku.dk)

- cp-12-429-2016-supplement-title-page.pdf
- SupTable1\_NannofossilData.xls
- SupTable2\_isotopeData.xls

The copyright of individual parts of the supplement might differ from the CC-BY 3.0 licence.
