# Supplementary material for: Late Cretaceous (late Campanian–Maastrichtian) sea-surface temperature record of the Boreal Chalk Sea
Source: Copernicus journal article supplement (doi:10.5194/cp-12-429-2016), 2016-02-24
Supplement: Supplementary file 2 [file SupTable1_NannofossilData.xls]

## Sheet: New072014
Samples	Depth (m)	% Ahmu. octoradiata	% Ahmu. regularis	% Arkh. cymbiformis s.l.	% Gartnerago spp.	% Kamp. maginificus	% Nephro. frequens	% Watz. barnesiae	NTI	Age(Ma)	% Total assemblage
1475	-13.28	0.471698	2.98742	20.7547	0.157233	1.72956	6.76101	0.628931	0.107981	66.0085	33.4906
8395	-13.57	1.17253	3.35008	12.2278	0	0.335008	19.7655	1.34003	0.122807	66.0137	38.191
8394	-13.81	0.220264	1.54185	10.793	0	0.440529	18.5022	0.881057	0.0748299	66.0179	32.3789
8393	-14.07	0.886525	2.48227	11.8794	0	0.886525	12.5887	3.01418	0.173184	66.0225	31.7376
1474	-14.29	1.32576	2.46212	12.3106	0	0.757576	9.84848	2.46212	0.168831	66.0264	29.1667
8392	-14.69	0.790514	2.96443	9.48617	0.197628	1.18577	6.917	6.52174	0.338028	66.0335	28.0632
8391	-14.94	0.900901	3.06306	8.64865	0	1.44144	9.72973	3.78378	0.248366	66.0379	27.5676
1473	-15.37	0.988142	3.95257	11.0672	0.197628	0.790514	2.7668	6.52174	0.398496	66.0456	26.2846
1471	-17.25	1.00402	2.81124	7.63052	0	1.20482	7.22892	5.42169	0.325397	66.0789	25.3012
1469	-19	1.18644	1.35593	6.94915	0.338983	0.677966	7.45763	9.83051	0.402439	66.1099	27.7966
1467	-21.39	1.02459	1.84426	12.7049	0.204918	1.02459	4.71311	4.30328	0.238095	66.1523	25.8197
1466	-22.1	1.50943	3.77358	7.35849	0.377358	1.13208	6.03774	3.58491	0.309524	66.1649	23.7736
1463	-24.42	1.21317	3.4662	5.37262	0.34662	0.866551	10.2253	5.89255	0.341772	66.206	27.383
1462	-26.62	0.735294	1.83824	15.4412	0.919118	0.367647	4.96324	7.72059	0.298851	66.245	31.9853
1458	-30.16	0.631579	1.05263	21.8947	0.210526	0.842105	4.21053	3.78947	0.148387	66.3078	32.6316
1455	-32.88	0.690608	0.966851	6.76796	0	2.76243	3.45304	2.62431	0.208	66.356	17.2652
1452	-35.42	0.699301	0.2331	4.662	0	2.7972	6.29371	0.932401	0.0746269	66.4011	15.6177
1447	-40.24	0.19802	0.39604	11.8812	0	3.9604	7.92079	2.17822	0.0970149	66.4865	26.5347
1442	-45.95	0.211416	0	11.6279	0	5.91966	4.22833	2.32558	0.0956522	66.5878	24.3129
1432	-55.9	1.02669	0.205339	6.3655	0	6.16016	5.74949	1.02669	0.06	66.8314	20.5339
1428	-59.28	0.221729	1.99557	9.97783	0.665188	11.0865	3.32594	1.10865	0.109375	66.9158	28.3814
1422	-64.8	0.323625	1.94175	6.79612	0.161812	3.8835	12.7832	0.485437	0.0920245	67.0538	26.3754
1417	-69.22	0.554529	0.554529	16.2662	0.184843	16.0813	0	0.369686	0.0271739	67.1642	34.0111
1411	-75	1.02916	1.37221	9.94854	0.171527	7.7187	0	2.5729	0.172932	67.3086	22.813
1407	-79.8	1.89125	0.472813	9.92908	0.236407	5.67376	0.945626	1.18203	0.0813953	67.4286	20.331
1401	-85.1	1.23711	0.412371	4.3299	1.03093	2.8866	20.8247	2.68041	0.0925926	67.5558	33.4021
8180	-90.34	1.21396	0.60698	3.0349	0.91047	5.31108	20.4856	1.36571	0.0599078	67.6545	32.9287
1390	-95.53	1.65517	3.86207	3.03448	0.275862	5.24138	2.34483	1.24138	0.289063	67.7523	17.6552
8157	-97.69	1.64179	0.447761	4.1791	0.597015	2.83582	8.0597	0.597015	0.0569106	67.793	18.3582
1386	-99.43	1.14943	1.6092	3.7931	0.344828	3.56322	19.4253	2.52874	0.12766	67.8258	32.4138
5266	-102.37	1.84922	0.711238	3.98293	0.426743	6.68563	11.2376	1.13798	0.0710383	67.8812	26.0313
1380	-104.91	0.584795	0.584795	7.01754	0.292398	3.36257	24.269	0.730994	0.0357143	67.929	36.8421
5620	-106.37	0.180505	1.26354	6.31769	0.722022	0.902527	24.7292	3.4296	0.125	67.9565	37.5451
1370	-114.81	1.37255	5.68627	4.70588	0.588235	4.70588	3.52941	4.31373	0.401575	68.1082	24.902
1364	-120.35	1.00167	2.83806	18.8648	0.500835	9.01503	0	6.34391	0.238095	68.1915	38.5643
1358	-125.85	1.94384	6.69546	9.28726	0.647948	9.07127	0	3.67171	0.331034	68.2741	31.3175
1353	-130.73	0.542495	3.9783	9.40325	0.542495	15.9132	1.44665	1.44665	0.163043	68.3475	33.2731
1348	-135.13	2.69504	6.38298	6.24113	0.141844	4.25532	0	10.0709	0.552381	68.4137	29.7872
1337	-145.25	2.69278	4.16157	5.26316	0.489596	7.71114	0	2.08078	0.278689	68.5658	22.399
1327	-154.55	1.02916	4.28816	8.06175	0.171527	6.68954	0	3.08748	0.316176	68.7056	23.3276
1316	-164.8	1.81818	2.54545	5.09091	0.545455	6.90909	0	3.09091	0.281818	68.8597	20
1310	-170.5	2.13144	4.26288	3.01954	0.35524	7.63766	0	5.86146	0.435115	68.9454	23.2682
1305	-175.22	0.278164	9.45758	7.51043	0.278164	2.92072	0	4.45063	0.558659	69.0164	24.8957
1300	-179.79	0.430108	0	10.7527	0.430108	5.5914	0	2.15054	0.111111	69.0851	19.3548
1294	-185.1	2.62751	4.9459	3.09119	0.463679	3.70943	0	0.463679	0.353535	69.1649	15.3014
1287	-191.24	0.217865	0.653595	0.653595	0	8.49673	0	2.17865	0.232143	69.2572	12.2004
1283	-194.84	2.13904	2.31729	1.78253	1.24777	3.74332	0	0.891266	0.264706	69.3114	12.1212
1272	-205.38	0.990099	5.61056	1.9802	1.34545	6.2	0	2.00669	0.420077	69.4878	18.133
1262	-214.6	3.0303	2.1645	6.06061	0.21645	6.70996	0	1.08225	0.168539	69.6726	19.2641
1257	-219.29	0	0	7.55149	0.686499	28.1465	0	1.83066	0.0479042	69.7666	38.2151
1250	-225.58	1.5873	0	9.97732	2.04082	17.9138	0	0.680272	0.0211268	69.8926	32.1995
1240	-234.89	0.420168	0	15.9664	0.420168	15.7563	0	0.420168	0.0127389	70.0792	32.9832
1229	-244.95	1.40845	2.61569	4.02414	0.804829	22.334	0	1.20724	0.118012	70.2809	32.3944
1218	-255.2	2.69608	0.245098	15.4412	0.490196	13.9706	0	0.980392	0.0362319	70.4863	33.8235
1207	-265.49	2.78884	0.59761	4.18327	0.796813	4.78088	0	0.199203	0.0597015	70.6926	13.3466
1203	-269.11	0.356506	0.534759	4.63458	0.356506	15.3298	0	0.713012	0.0569106	70.7651	21.9251
1196	-275.54	3.09278	0.618557	11.3402	1.23711	9.07216	0	0.412371	0.04	70.894	25.7732
1186	-284.81	1.7452	1.7452	10.9948	1.7452	5.06108	0	0.69808	0.111111	71.0798	21.9895
1175	-295.04	1.56986	1.0989	5.18053	2.66876	3.2967	0	1.41287	0.164948	71.2848	15.2276
1170	-299.63	0.743494	0.185874	1.67286	0.371747	11.71	0	3.34572	0.195876	71.3768	18.0297
1164	-305.29	2.27273	1.74825	1.74825	1.22378	6.81818	0	1.04895	0.188235	71.4903	14.8601
7398	-310.1	2.0595	7.78032	2.28833	0	2.746	0	0.686499	0.544118	71.6686	15.5606
1153	-315.41	3.04348	1.73913	0.869565	1.08696	5.86957	0	5	0.382716	72.0065	17.6087
7372	-319.85	0.956938	0.478469	0.478469	0.717703	1.67464	0	23.6842	0.863248	72.1894	27.9904
1141	-325.77	1.34228	0.671141	3.3557	2.90828	5.36913	0	8.2774	0.408163	72.2942	21.9239
1131	-335.06	1.23711	1.03093	0.618557	4.3299	2.06186	0	5.15464	0.428571	72.4587	14.433
1125	-340.38	0	0	0.212766	0.851064	2.97872	0	2.34043	0.366667	72.5529	6.38298
1119	-345.85	0.232558	0.930233	0.930233	2.7907	2.09302	0	6.74419	0.559322	72.6498	13.7209
1114	-350.72	0.246305	0.492611	4.92611	4.18719	2.95567	0	3.69458	0.253731	72.736	16.5025
1109	-355.34	1.17188	5.07812	1.95312	2.73438	1.30208	0	4.03646	0.56	72.8178	16.276
1098	-365.65	0	2.43363	0.221239	0.221239	0.884956	0	5.0885	0.85	72.9669	8.84956
1087	-375.86	0	1.54525	1.10375	0.441501	1.766	0	8.38852	0.75	73.0363	13.245
1083	-379.61	1.70358	1.1925	0.340716	0.170358	1.1925	0	10.7325	0.777778	73.0618	15.3322
1077	-385.18	0.46729	1.40187	0.233645	2.33645	1.63551	0	6.30841	0.622642	73.0996	12.3832
1066	-395.4	1.41414	1.61616	0.40404	2.0202	2.0202	0	10.7071	0.677778	73.1691	18.1818
1055	-405.77	3.40136	1.13379	1.5873	1.13379	4.53515	0	12.6984	0.564815	73.2396	24.4898
1044	-415.78	0.390625	1.36719	0.390625	1.5625	4.10156	0	16.6016	0.736	73.342	24.4141
1034	-425.24	0.952381	4.04762	1.42857	1.42857	4.28571	0	13.5714	0.685185	73.475	25.7143
1029	-429.71	0	1.4218	0.7109	0.7109	2.8436	0	9.47867	0.71875	73.554	15.1659
7086	-430.25	0	0.452489	1.13122	0.226244	2.0362	0	15.8371	0.827586	73.5622	19.6833
7076	-432.88	0.430108	1.72043	0.860215	0.430108	1.50538	0	13.9785	0.829545	73.6375	18.9247
7072	-433.97	0	2.44499	0.733496	1.46699	2.20049	0	8.55746	0.714286	73.6722	15.4034
7070	-434.69	1.65485	3.30969	0.945626	4.25532	1.89125	0	9.69267	0.597826	73.6951	21.7494
1023	-435.42	0	3.40909	0.227273	1.59091	2.27273	0	10.6818	0.775	73.7183	18.1818
1017	-441.13	0	0.729927	2.55474	0.547445	4.56204	0	7.84672	0.52809	73.9	16.2409
1011	-446.67	0.697674	4.18605	0.930233	0	5.11628	0	3.02326	0.516667	74.0763	13.9535
1007	-450.48	0	0	2.8169	1.40845	7.04225	0	2.58216	0.186441	74.1975	13.8498
1004	-453.29	2.37624	2.37624	1.38614	0.19802	5.34653	0	7.32673	0.510417	74.287	19.0099
